# Supplementary material for: In situ synthesis of luminescent carbon nanoparticles toward target bioimaging
Source: Royal Society of Chemistry journal article supplement (doi:10.1039/c4nr07422j), 2015-01-01
Supplement: c4nr07422j1.pdf [file c4nr07422j1.pdf]

## **Supplementary Information**

### ***In situ* synthesis of luminescent carbon nanoparticles toward target bioimaging**

**Shazid Md. Sharker<sup>a</sup>, Sung Min Kim<sup>b</sup>, Jung Eun Lee<sup>c</sup>, Ji Hoon Jeong<sup>c</sup>, Insik In<sup>d, e</sup>, Kang Dea Lee<sup>f</sup>, Haeshin Lee<sup>a\*</sup> and Sung Young Park<sup>b, e\*</sup>**

<sup>a</sup> *Department of Chemistry, Korea Advanced Institute of Science and Technology (KAIST), Daejeon 305-701, Republic of Korea.*

<sup>b</sup> *Department of Chemical and Biological Engineering, Korea National University of Transportation, Chungju 380-702, Republic of Korea.*

<sup>c</sup> *School of Pharmacy, Sungkyunkwan University, 300 Cheoncheon-dong, Jangan-gu, Suwon, Gyeonggi-do 440-746, Republic of Korea*

<sup>d</sup> *Department of Polymer Science and Engineering, Korea National University of Transportation, Chungju 380-702, Republic of Korea.*

<sup>e</sup> *Department of IT Convergence, Korea National University of Transportation, Chungju 380-702, Republic of Korea.*

<sup>f</sup> *Department of Otolaryngology-Head and Neck Surgery, College of Medicine, Kosin University, Busan, Republic of Korea*

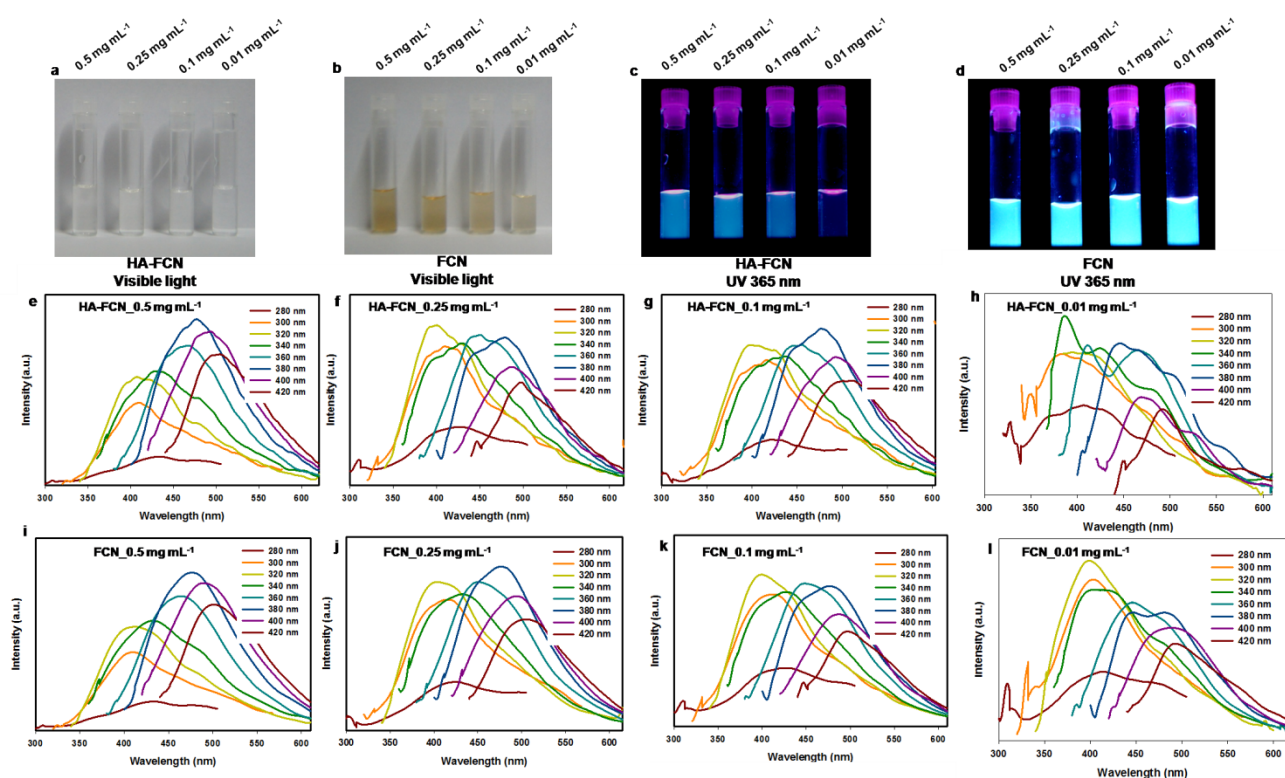

**Fig. S1-** An illuminated photographs of different concentrated aqueous solutions (0.5, 0.25, 0.1 and 0.01 mg mL<sup>-1</sup>) of HA-FCN and FCN under visible light (a-b), and 365 nm UV lamps (c-d), respectively. The concentration dependents (0.5, 0.25, 0.1 and 0.01 mg mL<sup>-1</sup>) fluorescence emission spectra of different excited wavelength (from 280 to 420 nm) of HA-FCN (e - h) and FCN (i - l), respectively.

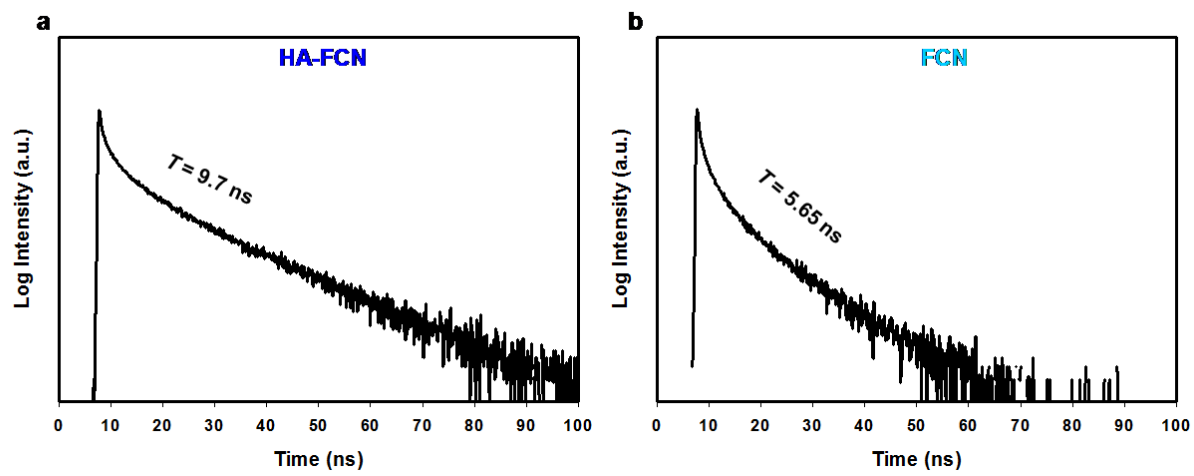

**Fig. S2-** Fluorescence life time curve of HA-FCN (a) and FCN (b) in 375 nm wavelength. The  $\tau$  value indicates respective fluorescence lifetime.

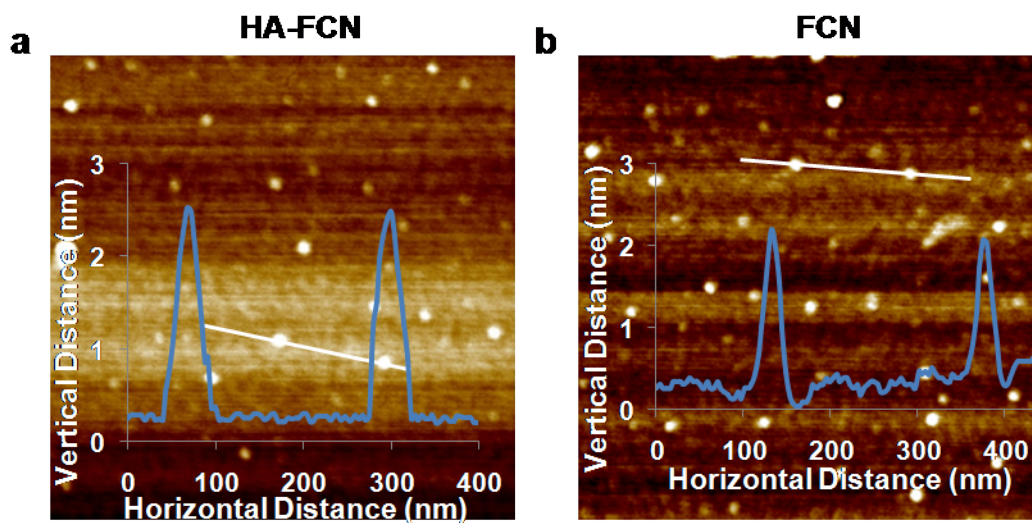

**Fig. S3-** Atomic Force Microscopy (AFM) images and height profile of a droplet of HA-FCN (a) and FCN (b) on a silicon wafer.

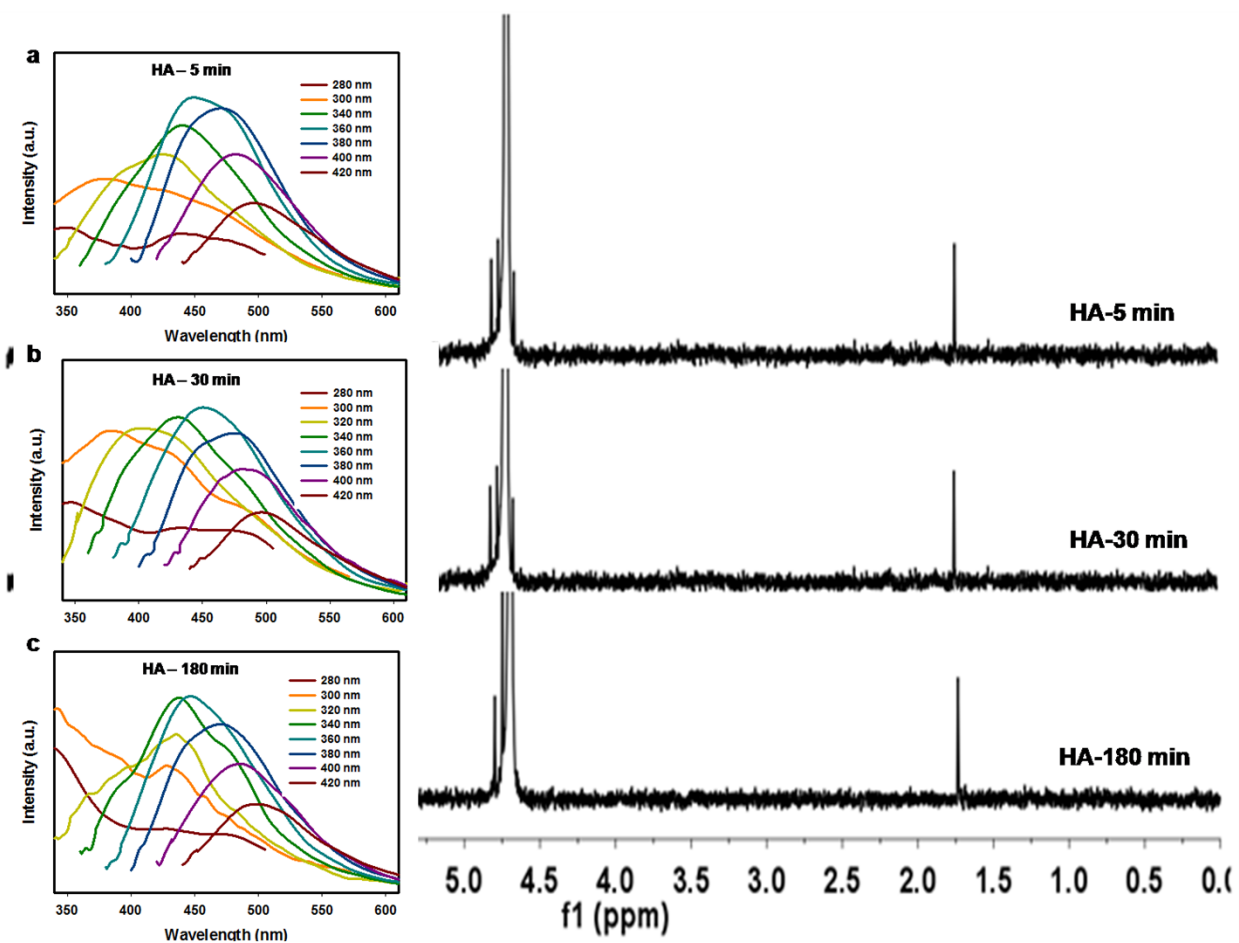

**Fig. S4-**  $^1\text{H}$  NMR spectra, and fluorescence emission intensity (from 280 to 420 nm excited wavelength) of hyaluronic acid (HA) in different dehydrated condition of 5 min (a), 30 min (b), and 180 min (c).

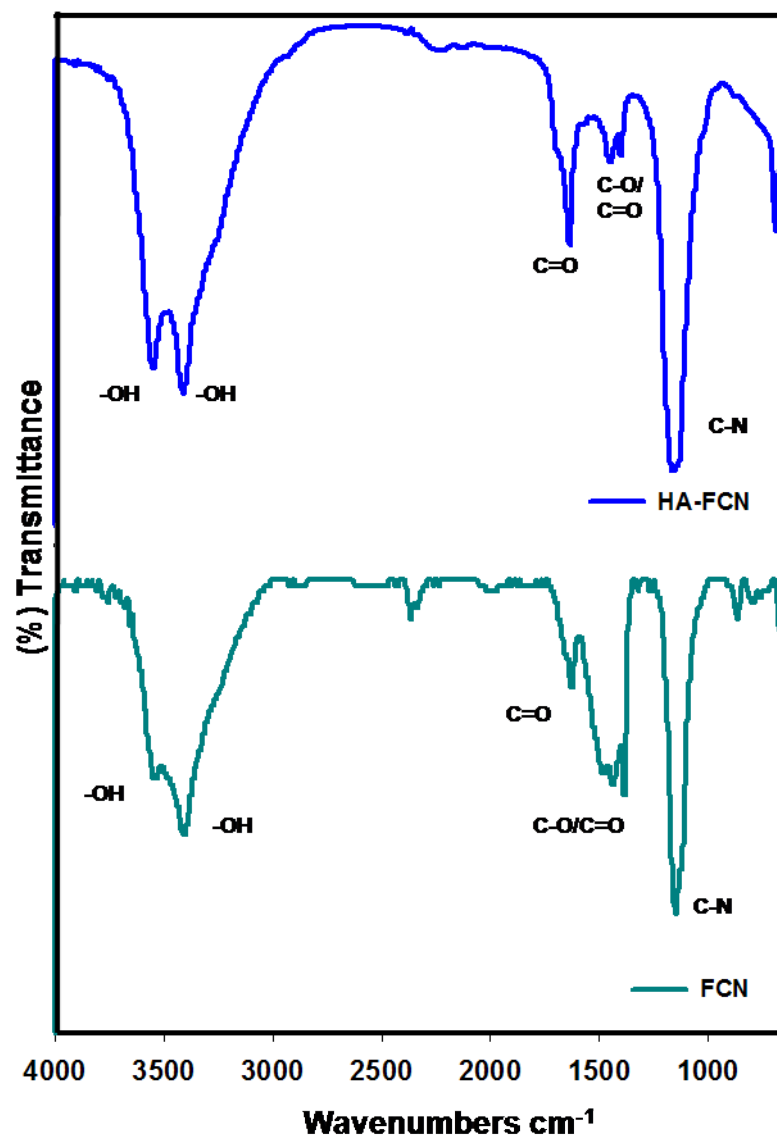

**Fig. S5-** FT-IR characterization of HA-FCN and FCN obtained from hyaluronic acid (HA).

**Table S1.** Elemental analysis and XPS based elemental composite of HA-FCN and FCN

|                | Area (%) of HA-FCN |      |       |       | Area (%) of FCN    |      |       |       |
|----------------|--------------------|------|-------|-------|--------------------|------|-------|-------|
|                | Elemental analysis | XPS  |       |       | Elemental analysis | XPS  |       |       |
| C              | 18.6               | 17.2 | C=C   | 27.20 | 35.5               | 38.6 | C=C   | 44.8  |
|                |                    |      | C-C   | 55.63 |                    |      | C-C   | 34.97 |
|                |                    |      | O-C=O | 17.17 |                    |      | O-C=O | 20.23 |
| N              | 0.6                | 0.6  |       |       | 5.3                | 5.4  |       |       |
| O <sup>a</sup> | 79.5               | 82.2 |       |       | 56.3               | 56.0 |       |       |
| H              | 1.3                | -    |       |       | 2.9                | -    |       |       |

<sup>a</sup> O by difference.

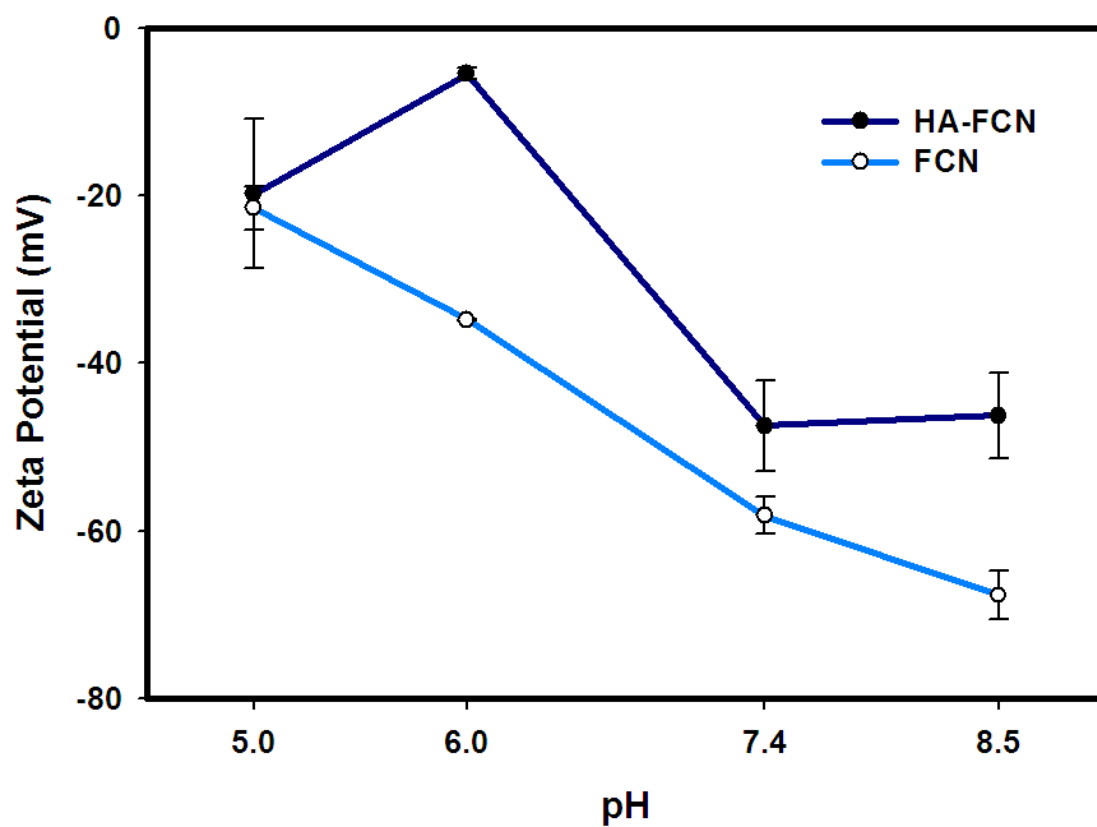

**Fig. S6** - Zeta potential of HA-FCN and FCN as a function of pH in an aqueous dispersion at a concentration of  $0.01 \text{ mg mL}^{-1}$ .



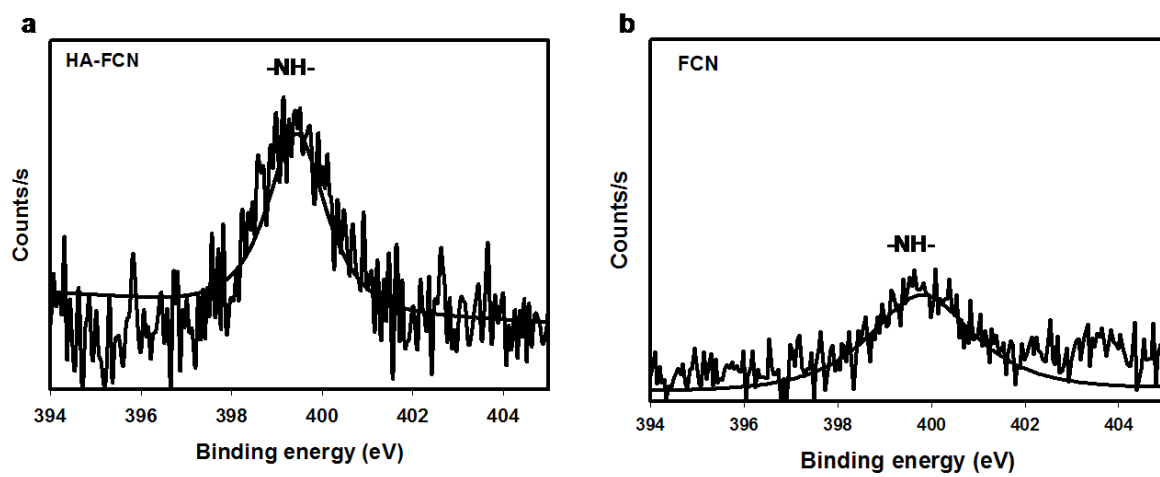

**Fig. S7** - XPS (N1s) peak for ratio characterization of amino groups in HA-FCN (a) and FCN (b).

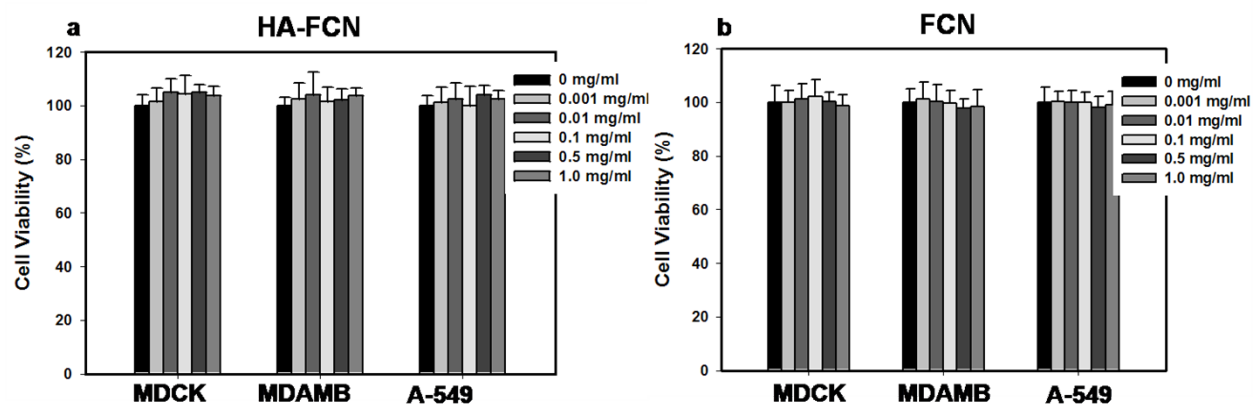

**Fig. S8** - MTT mediated *in vitro* cell viability assays at different concentrations of HA-FCN (a) and FCN (b) on MDCK, MDAMB and A-549 cells, respectively.

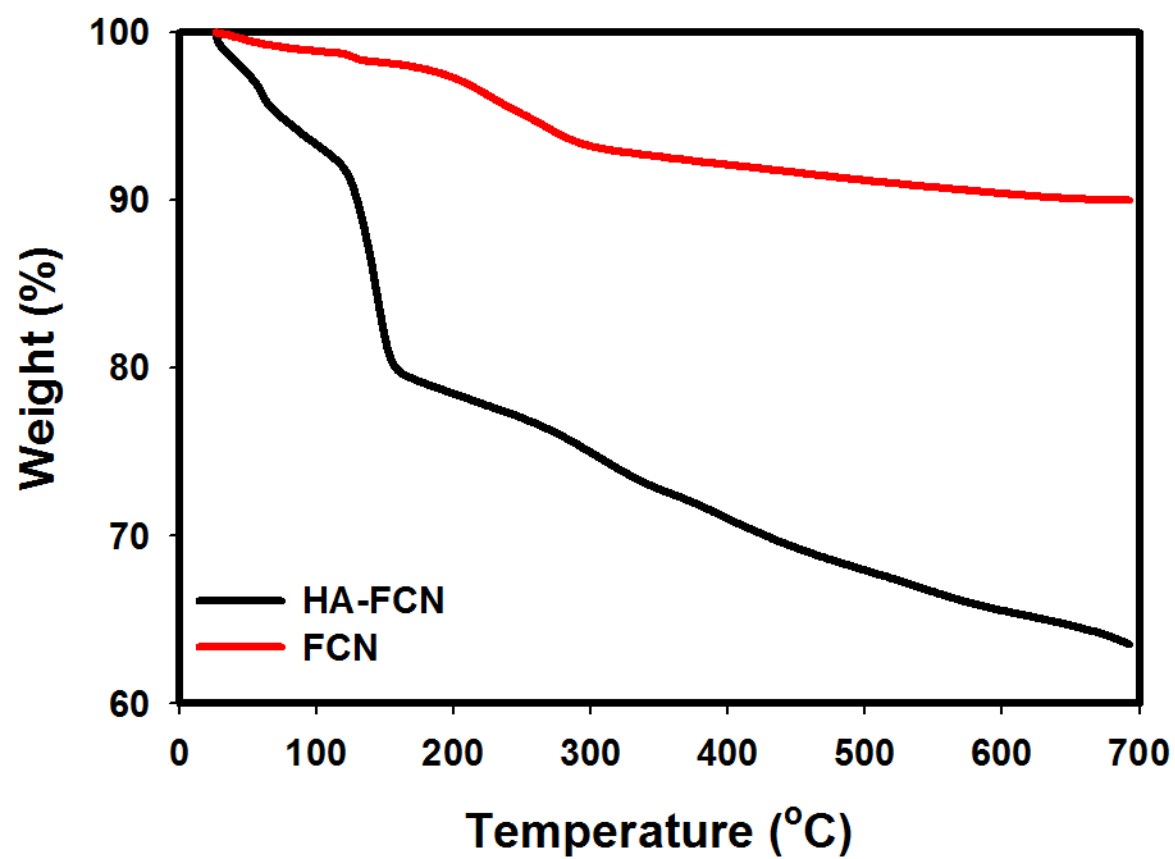

**Fig. S9** The comparison of thermograms (TGA) of the HA-FCN and FCN as a function weight loss and temperature (°C).
